# Supplementary material for: Better understanding the phenotypic effects of drugs through shared targets in genetic disease networks
Source: PubMed Central journal article supplement (PMC11794328; doi:10.3389/fphar.2024.1470931), 2025-01-22
Supplement: DataSheet1.pdf [file DataSheet1.pdf]

Supp Table 1 Top phenotype-gene pairs according to the hypergeometric index, based on the Orphanet dataset using the protein-target based methodology. HPO: Human Phenotype Ontology, Hyl: hypergeometric index.

| <b>HPO</b>        | <b>HPO name</b>    | <b>Gene Entrez</b> | <b>Gene Symbol</b> | <b>Hyl</b> |
|-------------------|--------------------|--------------------|--------------------|------------|
| <b>HP:0001056</b> | Milia              | 1294               | <i>COL7A1</i>      | 16.10      |
| <b>HP:0001030</b> | Fragile skin       | 1294               | <i>COL7A1</i>      | 13.64      |
| <b>HP:0009914</b> | Cyclopia           | 8928               | <i>FOXH1</i>       | 13.22      |
| <b>HP:0009914</b> | Cyclopia           | 84976              | <i>DISP1</i>       | 13.22      |
| <b>HP:0009914</b> | Cyclopia           | 7546               | <i>ZIC2</i>        | 13.22      |
| <b>HP:0009914</b> | Cyclopia           | 7050               | <i>TGIF1</i>       | 13.22      |
| <b>HP:0009914</b> | Cyclopia           | 6997               | <i>CRIPTO</i>      | 13.22      |
| <b>HP:0009914</b> | Cyclopia           | 6496               | <i>SIX3</i>        | 13.22      |
| <b>HP:0009914</b> | Cyclopia           | 4838               | <i>NODAL</i>       | 13.22      |
| <b>HP:0009914</b> | Cyclopia           | 2619               | <i>GAS1</i>        | 13.22      |
| <b>HP:0003798</b> | Nemaline bodies    | 4703               | <i>NEB</i>         | 13.03      |
| <b>HP:0100245</b> | Desmoid tumors     | 324                | <i>APC</i>         | 12.68      |
| <b>HP:0000871</b> | Panhypopituitarism | 8928               | <i>FOXH1</i>       | 12.68      |
| <b>HP:0000871</b> | Panhypopituitarism | 84976              | <i>DISP1</i>       | 12.68      |
| <b>HP:0000871</b> | Panhypopituitarism | 7546               | <i>ZIC2</i>        | 12.68      |
| <b>HP:0000871</b> | Panhypopituitarism | 7050               | <i>TGIF1</i>       | 12.68      |
| <b>HP:0000871</b> | Panhypopituitarism | 6997               | <i>CRIPTO</i>      | 12.68      |
| <b>HP:0000871</b> | Panhypopituitarism | 6496               | <i>SIX3</i>        | 12.68      |
| <b>HP:0000871</b> | Panhypopituitarism | 4838               | <i>NODAL</i>       | 12.68      |
| <b>HP:0000871</b> | Panhypopituitarism | 2619               | <i>GAS1</i>        | 12.68      |
