# Supplementary material for: Better understanding the phenotypic effects of drugs through shared targets in genetic disease networks
Source: PubMed Central journal article supplement (PMC11794328; doi:10.3389/fphar.2024.1470931), 2025-01-22
Supplement: DataSheet2.pdf [file DataSheet2.pdf]

Supp Table 2 Top phenotype-FunFam pairs according to the hypergeometric index, based on the Orphanet dataset using the domain-target based methodology. HPO: Human Phenotype Ontology, FunFam: CATH functional family, Hyl: hypergeometric index.

| <b>HPO</b> | <b>HPO name</b>                  | <b>FunFam</b>      | <b>Hyl</b> |
|------------|----------------------------------|--------------------|------------|
| HP:0007502 | Follicular hyperkeratosis        | 1.20.5.500-ff-1    | 13.53      |
| HP:0002384 | Focal impaired awareness seizure | 1.20.120.350-ff-5  | 11.89      |
| HP:0002384 | Focal impaired awareness seizure | 1.10.287.70-ff-6   | 11.89      |
| HP:0002384 | Focal impaired awareness seizure | 1.20.120.350-ff-4  | 11.59      |
| HP:0002384 | Focal impaired awareness seizure | 1.20.120.350-ff-3  | 11.59      |
| HP:0002217 | Slow-growing hair                | 1.20.5.500-ff-1    | 11.38      |
| HP:0002384 | Focal impaired awareness seizure | 1.10.287.70-ff-4   | 11.33      |
| HP:0002384 | Focal impaired awareness seizure | 1.10.287.70-ff-3   | 11.33      |
| HP:0002384 | Focal impaired awareness seizure | 1.10.287.70-ff-1   | 11.33      |
| HP:0002384 | Focal impaired awareness seizure | 1.10.238.10-ff-2   | 11.33      |
| HP:0002217 | Slow-growing hair                | 1.20.5.170-ff-4    | 11.22      |
| HP:0007446 | Palmoplantar blistering          | 1.20.5.500-ff-1    | 11.15      |
| HP:0002384 | Focal impaired awareness seizure | 1.20.120.350-ff-2  | 11.11      |
| HP:0000798 | Oligozoospermia                  | 3.30.70.330-ff-180 | 11.09      |
| HP:0007502 | Follicular hyperkeratosis        | 1.20.5.170-ff-4    | 11.01      |
| HP:0002217 | Slow-growing hair                | 1.20.5.1160-ff-1   | 10.47      |
| HP:0007502 | Follicular hyperkeratosis        | 1.20.5.1160-ff-1   | 10.26      |
| HP:0000139 | Uterine prolapse                 | 2.60.120.1000-ff-1 | 9.71       |
| HP:0011961 | Non-obstructive azoospermia      | 3.30.70.330-ff-180 | 9.66       |
| HP:0030268 | Hyperplastic callus formation    | 1.20.5.500-ff-1    | 9.53       |
