# Supplementary material for: Better understanding the phenotypic effects of drugs through shared targets in genetic disease networks
Source: PubMed Central journal article supplement (PMC11794328; doi:10.3389/fphar.2024.1470931), 2025-01-22
Supplement: DataSheet3.pdf [file DataSheet3.pdf]

Supp Table 3 Top drug-phenotype pairs according to the hypergeometric index, based on the Orphanet dataset using the protein-target based methodology, only including ChEMBL drugs with drug names that can be found within SIDER (all drugs are in phase 4). Drug: ChEMBL database ID, Hyl: hypergeometric index

| HPO        | HPO name              | Drug          | Drug Name       | Hyl  | Evidence                                                                                                                                                                                                                                               |
|------------|-----------------------|---------------|-----------------|------|--------------------------------------------------------------------------------------------------------------------------------------------------------------------------------------------------------------------------------------------------------|
| HP:0002018 | Nausea                | CHEMBL2105717 | CABOZANTINIB    | 3.75 | PMID: 38828446                                                                                                                                                                                                                                         |
| HP:0002018 | Nausea                | CHEMBL1946170 | REGORAFENIB     | 3.56 | PMID: 36798653                                                                                                                                                                                                                                         |
| HP:0002018 | Nausea                | CHEMBL477772  | PAZOPANIB       | 3.12 | PMID: 31630333,<br>PMID: 28506529                                                                                                                                                                                                                      |
| HP:0000029 | Testicular atrophy    | CHEMBL1274    | NILUTAMIDE      | 3.06 | PMID: 8997470<br>It isn't reported as an adverse effect. The drug is used for prostate cancer because it that block the effects of androgens at their receptor sites. The lack of testosterone binding to their receptors can cause testicular atrophy |
| HP:0002018 | Nausea                | CHEMBL1171837 | PONATINIB       | 3.02 | Cancer treatment usually cause nausea or vomit                                                                                                                                                                                                         |
| HP:0002018 | Nausea                | CHEMBL1336    | SORAFENIB       | 3.00 | PMID: 38828446                                                                                                                                                                                                                                         |
| HP:0002018 | Nausea                | CHEMBL24828   | VANDETANIB      | 2.97 | PMID: 27711083,<br>PMID: 27843809                                                                                                                                                                                                                      |
| HP:0002018 | Nausea                | CHEMBL669     | CYCLOBENZAPRINE | 2.97 | PMID: 16197668                                                                                                                                                                                                                                         |
| HP:0001962 | Palpitations          | CHEMBL669     | CYCLOBENZAPRINE | 2.82 | PMID: 739852                                                                                                                                                                                                                                           |
| HP:0001271 | Polyneuropathy        | CHEMBL2103837 | TAFAMIDIS       | 2.76 | PMID: 27878441                                                                                                                                                                                                                                         |
| HP:0002310 | Orofacial dyskinesia  | CHEMBL1373    | MODAFINIL       | 2.71 | PMID: 21037146                                                                                                                                                                                                                                         |
| HP:0100749 | Chest pain            | CHEMBL669     | CYCLOBENZAPRINE | 2.67 |                                                                                                                                                                                                                                                        |
| HP:0002354 | Memory impairment     | CHEMBL135400  | ZOPICLONE       | 2.62 | PMID: 11062863,<br>PMID: 38149178                                                                                                                                                                                                                      |
| HP:0002018 | Nausea                | CHEMBL1421    | DASATINIB       | 2.53 | PMID: 28566209,<br>PMID: 27267844                                                                                                                                                                                                                      |
| HP:0007185 | Loss of consciousness | CHEMBL317052  | REGADENOSON     | 2.52 | PMID: 37337782                                                                                                                                                                                                                                         |
| HP:0000132 | Menorrhagia           | CHEMBL231779  | APIXABAN        | 2.52 | PMID: 23220847                                                                                                                                                                                                                                         |
| HP:0001337 | Tremor                | CHEMBL135400  | ZOPICLONE       | 2.49 | PMID: 18077750                                                                                                                                                                                                                                         |
| HP:0000771 | Gynecomastia          | CHEMBL806     | FLUTAMIDE       | 2.49 | PMID: 25270521,<br>PMID: 16845534                                                                                                                                                                                                                      |
| HP:0000771 | Gynecomastia          | CHEMBL409     | BICALUTAMIDE    | 2.49 | PMID: 25270521,<br>PMID: 16845534                                                                                                                                                                                                                      |
| HP:0000771 | Gynecomastia          | CHEMBL1274    | NILUTAMIDE      | 2.49 | PMID: 25270521,<br>PMID: 16845534                                                                                                                                                                                                                      |
