# Supplementary material for: Better understanding the phenotypic effects of drugs through shared targets in genetic disease networks
Source: PubMed Central journal article supplement (PMC11794328; doi:10.3389/fphar.2024.1470931), 2025-01-22
Supplement: DataSheet4.pdf [file DataSheet4.pdf]

Supp Table 4 Top drug-phenotype pairs according to the hypergeometric index, based on the Orphanet dataset using the domain-target based methodology, only including ChEMBL drugs with drug names that can be found within SIDER. Drug: ChEMBL database ID, HyI: hypergeometric index

| HPO        | HPO name                      | Drug          | Drug Name       | HyI   | Evidence                             |
|------------|-------------------------------|---------------|-----------------|-------|--------------------------------------|
| HP:0001894 | Thrombocytosis                | CHEMBL255863  | NILOTINIB       | 13.79 | PMID: 28761360,<br>PMID: 37686630    |
| HP:0003401 | Paresthesia                   | CHEMBL1825138 | NA              | 12.82 |                                      |
| HP:0001894 | Thrombocytosis                | CHEMBL941     | IMATINIB        | 12.49 | PMID: 28761360,<br>PMID: 37686630    |
| HP:0000132 | Menorrhagia                   | CHEMBL231779  | APIXABAN        | 11.17 | PMID: 23220847                       |
| HP:0002170 | Intracranial hemorrhage       | CHEMBL48361   | DABIGATRAN      | 10.98 |                                      |
| HP:0000225 | Gingival bleeding             | CHEMBL231779  | APIXABAN        | 10.97 | PMID: 26535102                       |
| HP:0100242 | Sarcoma                       | CHEMBL477772  | PAZOPANIB       | 10.89 | PMID: 31123606                       |
| HP:0002018 | Nausea                        | CHEMBL669     | CYCLOBENZAPRINE | 10.83 | PMID: 26425251                       |
| HP:0001962 | Palpitations                  | CHEMBL669     | CYCLOBENZAPRINE | 10.56 | PMID: 739852                         |
| HP:0012086 | Abnormal urinary color        | CHEMBL58      | MITOXANTRONE    | 9.35  | PMID: 15623667                       |
| HP:0100749 | Chest pain                    | CHEMBL669     | CYCLOBENZAPRINE | 9.02  |                                      |
| HP:0005214 | Intestinal obstruction        | CHEMBL941     | IMATINIB        | 9.02  | PMID: 12600228                       |
| HP:0100723 | Gastrointestinal stroma tumor | CHEMBL941     | IMATINIB        | 8.95  | PMID: 38886160,<br>PMID: 37254018    |
| HP:0001688 | Sinus bradycardia             | CHEMBL1008    | BEPRIDIL        | 8.89  | PMID: 19359813                       |
| HP:0001664 | Torsade de pointes            | CHEMBL473     | DOFETILIDE      | 8.83  | PMID: 25634399,<br>PMID: 39221117    |
| HP:0001664 | Torsade de pointes            | CHEMBL1108    | DROPERIDOL      | 8.83  | PMID: 19291568                       |
| HP:0001664 | Torsade de pointes            | CHEMBL1008    | BEPRIDIL        | 8.83  | PMID: 33026317                       |
| HP:0005110 | Atrial fibrillation           | CHEMBL549     | CITALOPRAM      | 8.65  | PMID: 11793617<br>Induce bradycardia |
| HP:0005110 | Atrial fibrillation           | CHEMBL473     | DOFETILIDE      | 8.65  | PMID: 11568824                       |
| HP:0005110 | Atrial fibrillation           | CHEMBL43      | AMSACRINE       | 8.65  | PMID: 38244650                       |
