# Supplementary material for: Better understanding the phenotypic effects of drugs through shared targets in genetic disease networks
Source: PubMed Central journal article supplement (PMC11794328; doi:10.3389/fphar.2024.1470931), 2025-01-22
Supplement: DataSheet5.pdf [file DataSheet5.pdf]

Supp Table 5 Top drug-phenotype pairs according to the hypergeometric index, based on the OMIM dataset using the protein-target based methodology, only including ChEMBL drugs with drug names found by literature comention  
Drug: ChEMBL database ID, Hyl: hypergeometric index.

| HPO        | HPO name                                | Drug          | Drug Name         | Phase | Hyl  |
|------------|-----------------------------------------|---------------|-------------------|-------|------|
| HP:0002930 | Impaired sensitivity to thyroid hormone | CHEMBL557     | DETROTHYRONINE    | 0     | 7.20 |
| HP:0002930 | Impaired sensitivity to thyroid hormone | CHEMBL2035874 | EPROTIROME        | 3     | 7.20 |
| HP:0002930 | Impaired sensitivity to thyroid hormone | CHEMBL549748  | TETRAC            | 0     | 6.72 |
| HP:0002930 | Impaired sensitivity to thyroid hormone | CHEMBL41632   | TIRATRICOL        | 2     | 6.72 |
| HP:0002930 | Impaired sensitivity to thyroid hormone | CHEMBL1624    | LEVOTHYROXINE     | 4     | 6.42 |
| HP:0002930 | Impaired sensitivity to thyroid hormone | CHEMBL1544    | LIOTHYRONINE      | 4     | 6.42 |
| HP:0002069 | Bilateral tonic-clonic seizure          | CHEMBL3809595 | NA                | 0     | 6.25 |
| HP:0100723 | Gastrointestinal stroma tumor           | CHEMBL1642    | IMATINIB MESYLATE | 4     | 5.95 |
| HP:0004319 | Decreased circulating aldosterone level | CHEMBL934     | METYRAPONE        | 4     | 5.75 |
| HP:0012166 | Skin-picking                            | CHEMBL41      | FLUOXETINE        | 4     | 5.55 |
| HP:0100697 | Neurofibrosarcoma                       | CHEMBL507361  | MIRDAMETINIB      | 2     | 5.42 |
| HP:0005506 | Chronic myelogenous leukemia            | CHEMBL1289926 | AXITINIB          | 4     | 5.31 |
| HP:0002069 | Bilateral tonic-clonic seizure          | CHEMBL507974  | TETRODOTOXIN      | 3     | 5.28 |
| HP:0004319 | Decreased circulating aldosterone level | CHEMBL9298    | FADROZOLE         | 0     | 5.28 |
| HP:0000079 | Abnormality of the urinary system       | CHEMBL1560    | CAPTOPRIL         | 4     | 5.28 |
| HP:0000726 | Dementia                                | CHEMBL116955  | CONGO RED         | 0     | 5.18 |
| HP:0005506 | Chronic myelogenous leukemia            | CHEMBL206834  | BAFETINIB         | 2     | 5.18 |
| HP:0100723 | Gastrointestinal stroma tumor           | CHEMBL276711  | SEMAXANIB         | 3     | 5.10 |
| HP:0030078 | Lung adenocarcinoma                     | CHEMBL2347958 | NA                | 0     | 5.07 |
| HP:0003076 | Glycosuria                              | CHEMBL3039507 | SOTAGLIFLOZIN     | 4     | 5.02 |
