# Supplementary material for: Better understanding the phenotypic effects of drugs through shared targets in genetic disease networks
Source: PubMed Central journal article supplement (PMC11794328; doi:10.3389/fphar.2024.1470931), 2025-01-22
Supplement: DataSheet6.pdf [file DataSheet6.pdf]

Supp Table 6 Top drug-phenotype pairs according to the hypergeometric index, based on the OMIM dataset using the domain-target based methodology, only including ChEMBL drugs with drug names found by literature comention Drug: ChEMBL database ID, Hyl: hypergeometric index.

| HPO        | HPO name                                            | Drug          | Drug Name         | Phase | Hyl   |
|------------|-----------------------------------------------------|---------------|-------------------|-------|-------|
| HP:0030078 | Lung adenocarcinoma                                 | CHEMBL2347958 | NA                | 0     | 37.89 |
| HP:0033124 | Increased serum sorbitol concentration              | CHEMBL1467    | ALLOPURINOL       | 4     | 34.87 |
| HP:0100723 | Gastrointestinal stroma tumor                       | CHEMBL1642    | IMATINIB MESYLATE | 4     | 34.77 |
| HP:0004758 | Effort-induced polymorphic ventricular tachycardia  | CHEMBL2440854 | NA                | 0     | 34.21 |
| HP:0032147 | Erythromelalgia                                     | CHEMBL4208190 | NA                | 0     | 33.77 |
| HP:0007215 | Periodic hyperkalemic paralysis                     | CHEMBL4208190 | NA                | 0     | 33.77 |
| HP:0033122 | Absent P wave                                       | CHEMBL3707392 | ELECLAZINE        | 3     | 32.73 |
| HP:0200026 | Ocular pain                                         | CHEMBL698     | TETRACAINE        | 4     | 32.73 |
| HP:0030078 | Lung adenocarcinoma                                 | CHEMBL2110732 | DACOMITINIB       | 4     | 31.18 |
| HP:0002069 | Bilateral tonic-clonic seizure                      | CHEMBL4208190 | NA                | 0     | 30.77 |
| HP:0002069 | Bilateral tonic-clonic seizure                      | CHEMBL3809595 | NA                | 0     | 30.77 |
| HP:0030078 | Lung adenocarcinoma                                 | CHEMBL1173655 | AFATINIB          | 4     | 30.08 |
| HP:0033258 | Sudden unexpected death in epilepsy                 | CHEMBL4208190 | NA                | 0     | 29.87 |
| HP:0031475 | Status epilepticus without prominent motor symptoms | CHEMBL4208190 | NA                | 0     | 28.81 |
| HP:0002133 | Status epilepticus                                  | CHEMBL4208190 | NA                | 0     | 28.81 |
| HP:0032147 | Erythromelalgia                                     | CHEMBL507974  | TETRODOTOXIN      | 3     | 28.51 |
| HP:0007215 | Periodic hyperkalemic paralysis                     | CHEMBL507974  | TETRODOTOXIN      | 3     | 28.51 |
| HP:0100723 | Gastrointestinal stroma tumor                       | CHEMBL276711  | SEMAXANIB         | 3     | 28.47 |
| HP:0003768 | Periodic paralysis                                  | CHEMBL4208190 | NA                | 0     | 27.96 |
| HP:0100723 | Gastrointestinal stroma tumor                       | CHEMBL101253  | VATALANIB         | 3     | 27.71 |
