# Supplementary material for: Better understanding the phenotypic effects of drugs through shared targets in genetic disease networks
Source: PubMed Central journal article supplement (PMC11794328; doi:10.3389/fphar.2024.1470931), 2025-01-22
Supplement: DataSheet7.pdf [file DataSheet7.pdf]

Supp Table 7 Top drug-phenotype pairs according to the hypergeometric index, based on the Orphanet dataset using the protein-target based methodology, only including ChEMBL drugs with drug names found by literature mention  
Drug: ChEMBL database ID, Hyl: hypergeometric index.

| HPO        | HPO name                                              | Drug          | Drug Name    | Phase | Hyl  |
|------------|-------------------------------------------------------|---------------|--------------|-------|------|
| HP:0011739 | Dexamethasone-suppressible primary hyperaldosteronism | CHEMBL934     | METYRAPONE   | 4     | 7.03 |
| HP:0031475 | Status epilepticus without prominent motor symptoms   | CHEMBL507974  | TETRODOTOXIN | 3     | 6.72 |
| HP:0011746 | Secretory adrenocortical adenoma                      | CHEMBL934     | METYRAPONE   | 4     | 6.55 |
| HP:0025101 | Dysgenesis of the hippocampus                         | CHEMBL507974  | TETRODOTOXIN | 3     | 6.13 |
| HP:0000061 | Ambiguous genitalia, female                           | CHEMBL9298    | FADROZOLE    | 0     | 5.77 |
| HP:0001688 | Sinus bradycardia                                     | CHEMBL45816   | MIBEFRADIL   | 4     | 5.69 |
| HP:0001664 | Torsade de pointes                                    | CHEMBL45816   | MIBEFRADIL   | 4     | 5.62 |
| HP:0008221 | Adrenal hyperplasia                                   | CHEMBL934     | METYRAPONE   | 4     | 5.29 |
| HP:0011746 | Secretory adrenocortical adenoma                      | CHEMBL157101  | KETOCONAZOLE | 4     | 5.11 |
| HP:0002121 | Generalized non-motor (absence) seizure               | CHEMBL3809595 | NA           | 0     | 4.90 |
| HP:0012125 | Prostate cancer                                       | CHEMBL191334  | NUTLIN-3     | 0     | 4.80 |
| HP:0008151 | Prolonged prothrombin time                            | CHEMBL512351  | BETRIXABAN   | 4     | 4.75 |
| HP:0008151 | Prolonged prothrombin time                            | CHEMBL206335  | RAZAXABAN    | 0     | 4.75 |
| HP:0002018 | Nausea                                                | CHEMBL276711  | SEMAXANIB    | 3     | 4.71 |
| HP:0002069 | Bilateral tonic-clonic seizure                        | CHEMBL3809595 | NA           | 0     | 4.59 |
| HP:0002018 | Nausea                                                | CHEMBL1289926 | AXITINIB     | 4     | 4.14 |
| HP:0001912 | Abnormal basophil morphology                          | CHEMBL941     | IMATINIB     | 4     | 4.01 |
| HP:0002121 | Generalized non-motor (absence) seizure               | CHEMBL507974  | TETRODOTOXIN | 3     | 3.93 |
| HP:0008221 | Adrenal hyperplasia                                   | CHEMBL157101  | KETOCONAZOLE | 4     | 3.84 |
| HP:0004319 | Decreased circulating aldosterone level               | CHEMBL157101  | KETOCONAZOLE | 4     | 3.77 |
