# Supplementary material for: Better understanding the phenotypic effects of drugs through shared targets in genetic disease networks
Source: PubMed Central journal article supplement (PMC11794328; doi:10.3389/fphar.2024.1470931), 2025-01-22
Supplement: DataSheet8.pdf [file DataSheet8.pdf]

Supp Table 8 Top drug-phenotype pairs according to the hypergeometric index, based on the Orphanet dataset using the domain-target based methodology, only including ChEMBL drugs with drug names found by literature comention  
Drug: ChEMBL database ID, Hyl: hypergeometric index.

| HPO        | HPO name                                            | Drug          | Drug Name    | Phase | Hyl   |
|------------|-----------------------------------------------------|---------------|--------------|-------|-------|
| HP:0001688 | Sinus bradycardia                                   | CHEMBL45816   | MIBEFRADIL   | 4     | 47.51 |
| HP:0001664 | Torsade de pointes                                  | CHEMBL45816   | MIBEFRADIL   | 4     | 47.03 |
| HP:0003712 | Skeletal muscle hypertrophy                         | CHEMBL4208190 | NA           | 0     | 31.90 |
| HP:0001276 | Hypertonia                                          | CHEMBL698     | TETRACAINE   | 4     | 31.90 |
| HP:0003712 | Skeletal muscle hypertrophy                         | CHEMBL698     | TETRACAINE   | 4     | 30.86 |
| HP:0007215 | Periodic hyperkalemic paralysis                     | CHEMBL4208190 | NA           | 0     | 30.49 |
| HP:0031475 | Status epilepticus without prominent motor symptoms | CHEMBL4208190 | NA           | 0     | 26.89 |
| HP:0003712 | Skeletal muscle hypertrophy                         | CHEMBL507974  | TETRODOTOXIN | 3     | 26.64 |
| HP:0003712 | Skeletal muscle hypertrophy                         | CHEMBL501134  | SAXITOXIN    | 0     | 26.64 |
| HP:0012726 | Episodic hypokalemia                                | CHEMBL4208190 | NA           | 0     | 26.22 |
| HP:0002121 | Generalized non-motor (absence) seizure             | CHEMBL4208190 | NA           | 0     | 25.83 |
| HP:0002121 | Generalized non-motor (absence) seizure             | CHEMBL3809595 | NA           | 0     | 25.83 |
| HP:0007215 | Periodic hyperkalemic paralysis                     | CHEMBL507974  | TETRODOTOXIN | 3     | 25.22 |
| HP:0007359 | Focal-onset seizure                                 | CHEMBL4208190 | NA           | 0     | 24.83 |
| HP:0007359 | Focal-onset seizure                                 | CHEMBL3809595 | NA           | 0     | 24.83 |
| HP:0002069 | Bilateral tonic-clonic seizure                      | CHEMBL4208190 | NA           | 0     | 24.68 |
| HP:0002069 | Bilateral tonic-clonic seizure                      | CHEMBL3809595 | NA           | 0     | 24.68 |
| HP:0025101 | Dysgenesis of the hippocampus                       | CHEMBL4208190 | NA           | 0     | 23.90 |
| HP:0008151 | Prolonged prothrombin time                          | CHEMBL512351  | BETRIXABAN   | 4     | 23.44 |
| HP:0008151 | Prolonged prothrombin time                          | CHEMBL206335  | RAZAXABAN    | 0     | 23.44 |
